# Supplementary material for: A pentacenequinone derivative with aggregation-induced emission enhancement characteristics for the picogram detection of Fe3+ ions in mixed aqueous media
Source: Royal Society of Chemistry journal article supplement (doi:10.1039/c3dt32546f), 2013-01-01
Supplement: c3dt32546f.pdf [file c3dt32546f.pdf]

## Supporting Information

### **Pentacenequinone derivative with aggregation-induced emission enhancement characteristics for the picogram detection of Fe<sup>3+</sup> ions in mixed aqueous media**

Vandana Bhalla,\* Ankush Gupta, and Manoj Kumar\*

*Department of Chemistry, UGC Sponsored-Centre for Advanced Studies-I, Guru Nanak Dev University, Amritsar-143005, Punjab, India*

Email Address: vanmanan@yahoo.co.in

- S2** General experimental procedures
- S3** Synthetic scheme of compound **1**.
- S4** Calculations for quantum yield
- S5** Absorption spectra of compound **1** showing the variation of absorption intensity in H<sub>2</sub>O/THF mixture with different water fractions and normalized fluorescence spectra of nanoaggregates and solid state spectra of compound **1**
- S6** SEM images of nanoaggregate of **1** and in the presence of Fe<sup>3+</sup> ions.
- S7** Reversibility experiment of nanoaggregates of **1** for Fe<sup>3+</sup> ions and fluorescence spectra of nanoaggregates of **1** upon additions of various metal ions.
- S8** Fluorescence spectra of nanoaggregates of **1** upon additions of Fe(III)-EDTA complex and SEM-EDX spectrum of nanoaggregates of **1** in presence of Fe<sup>3+</sup> ions.
- S9** <sup>1</sup>H NMR spectra of **1** before and after treatment with the iron perchlorate.
- S10** Fluorescence spectrum of compound **1** with the addition of Fe<sup>3+</sup> ions in THF
- S11** <sup>1</sup>H NMR of compound **1** in CDCl<sub>3</sub>
- S12** <sup>13</sup>C NMR of compound **1** in CDCl<sub>3</sub>
- S13** Mass spectrum of **1**

### General Experimental Procedures:

All reagents were purchased from Aldrich and were used without further purification. THF was dried over sodium and benzophenone and kept over molecular sieves overnight before use. UV-vis spectra were recorded on a SHIMADZU UV-2450 spectrophotometer, with a quartz cuvette (path length, 1 cm). The cell holder was thermostatted at 25°C. The fluorescence spectra were recorded with a SHIMADZU 5301 PC spectrofluorimeter.  $^1\text{H}$  was recorded on a JOEL-FT NMR-AL 300 MHz spectrophotometer using  $\text{CDCl}_3$  as solvent and tetramethylsilane  $\text{SiMe}_4$  as internal standards. UV-vis studies were performed in THF. Data are reported as follows: chemical shifts in ppm ( $\delta$ ), multiplicity (s = singlet, d = doublet, br = broad singlet m = multiplet), coupling constants  $J$  (Hz), integration, and interpretation. Silica gel 60 (60–120 mesh) was used for column chromatography.

### Synthetic scheme of compound 1.

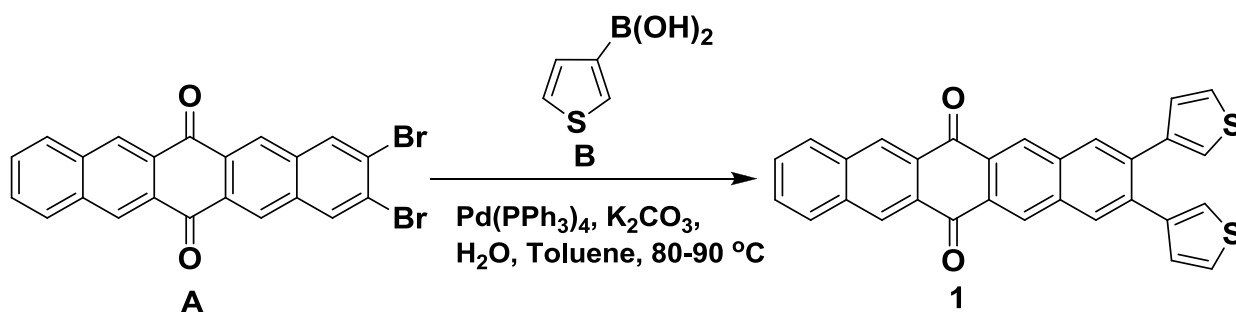

**Scheme 1** Pentacenequinone-based compound 1

**Synthesis of compound 1.** To a solution of **A** (0.5 g, 1.07 mmol) and **B** (0.302g, 2.36 mmol) in toluene were added K<sub>2</sub>CO<sub>3</sub> (0.59 g, 4.28 mmol), distilled H<sub>2</sub>O (2.1 mL), and [Pd(PPh<sub>3</sub>)<sub>4</sub>] (0.272 g, 0.24 mmol) under N<sub>2</sub>, and the reaction mixture was refluxed overnight. The toluene was then removed under vacuum, and the residue so obtained was treated with water, extracted with dichloromethane, and dried over anhydrous Na<sub>2</sub>SO<sub>4</sub>. The organic layer was evaporated, and compound was purified by column chromatography using (70:30) (Hexane:Chloroform) as an eluent to give compound **1** in 55% yield as yellow solid; mp: >260 °C; <sup>1</sup>H NMR (300 MHz, CDCl<sub>3</sub>): δ = 6.90 [d, 2H, J=6.3 Hz, ArH], 7.24-7.29 [m, 4H, ArH], 7.70-7.74 [m, 2H, ArH], 8.13-8.16 [m, 2H, ArH], 8.18 [s, 2H, ArH], 8.96 [s, 4H, ArH]; <sup>13</sup>C NMR (75.45 MHz, CDCl<sub>3</sub>): 114.27, 124.05, 125.35, 128.72, 129.52, 129.82, 130.14, 130.85, 134.46, 135.29, 137.67, 140.91, 182.93; TOF MS ES<sup>+</sup>: 473.2 (M+1)<sup>+</sup>; Elemental analysis: Calcd. for C<sub>30</sub>H<sub>16</sub>S<sub>2</sub>O<sub>2</sub>: C 76.25; H 3.41; Found: C 76.20 %; H 3.35 %.

### Calculations for quantum yield<sup>1</sup>:

Fluorescence quantum yield was determined using optically matching solutions of diphenylanthracene ( $\Phi_{fr} = 0.9$  in cyclohexane) as standard at an excitation wavelength of 352 nm and quantum yield is calculated using the equation:

$$\Phi_{fs} = \Phi_{fr} \times \frac{1 - 10^{-A_r L_r}}{1 - 10^{-A_s L_s}} \times \frac{N_s^2}{N_r^2} \times \frac{D_s}{D_r}$$

$\Phi_{fs}$  and  $\Phi_{fr}$  are the radiative quantum yields of sample and the reference respectively,  $A_s$  and  $A_r$  are the absorbance of the sample and the reference respectively,  $D_s$  and  $D_r$  the respective areas of emission for sample and reference.  $L_s$  and  $L_r$  are the lengths of the absorption cells of sample and reference respectively.  $N_s$  and  $N_r$  are the refractive indices of the sample and reference solutions (pure solvents were assumed respectively).

---

<sup>1</sup> J. N. Demas and G. A. Grosby, *J. Phys. Chem.*, 1971, **75**, 991.

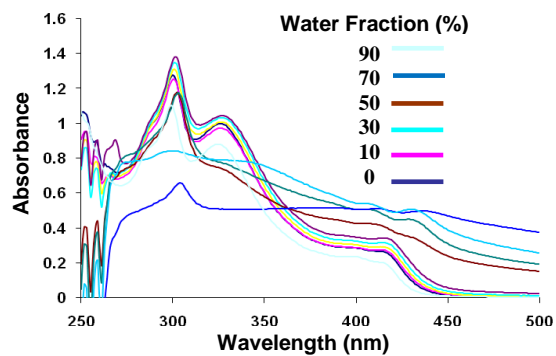

**Fig. S1.** Absorption spectra of compound **1** (10 μM) showing the variation of absorption intensity in H<sub>2</sub>O/THF mixture with different water fractions.

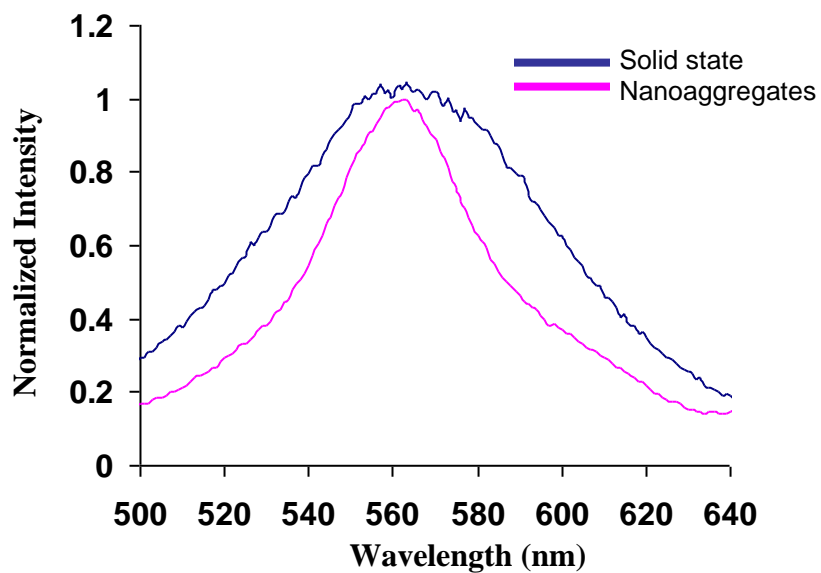

**Fig. S2.** Normalized fluorescence spectra of nanoaggregates and solid state spectra of compound **1**.

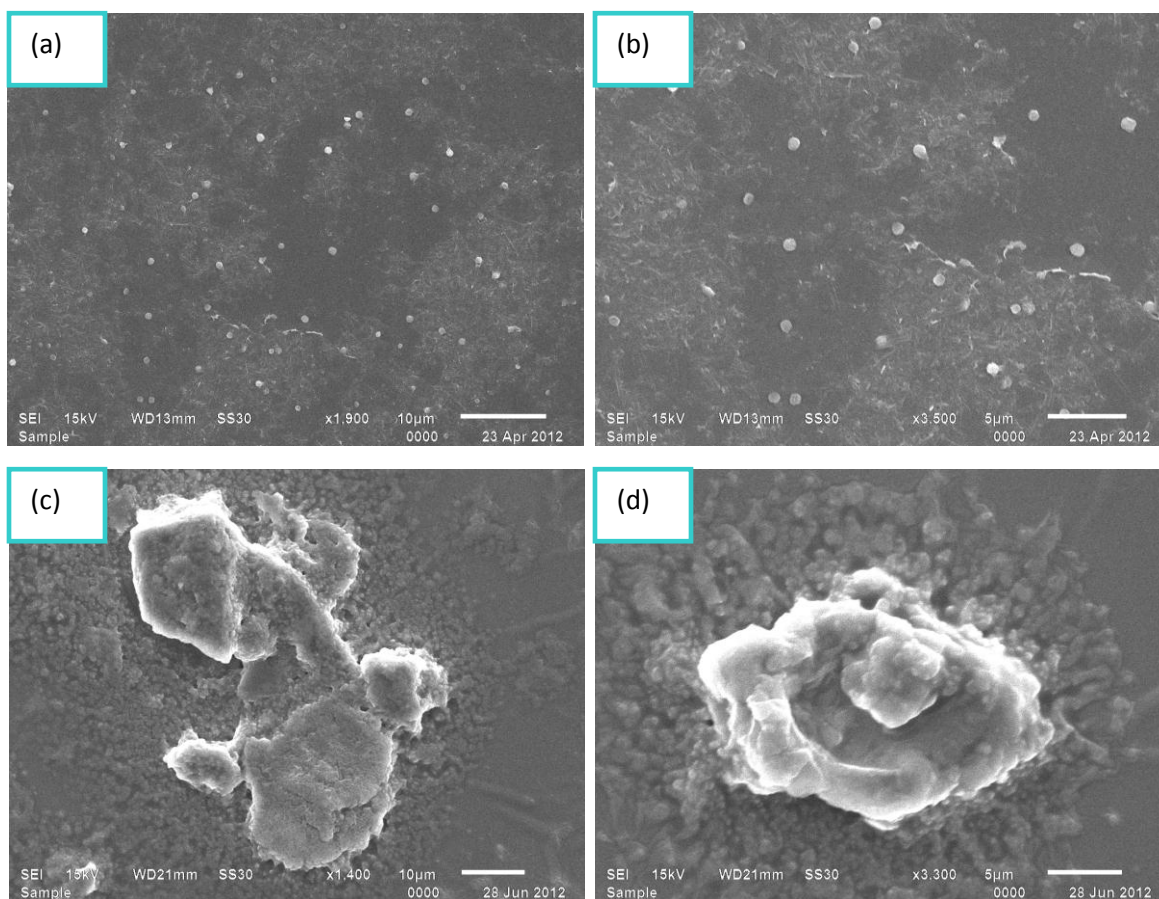

**Fig. S3** (a) and (b) are SEM images of **1** nanoaggregates obtained from a suspension that contained 90% volume fraction of water in THF. (c) and (d) are larger aggregates of **1.Fe<sup>3+</sup>** complex. scale bar (a and c) 10 µm (b and d) 5 µm.

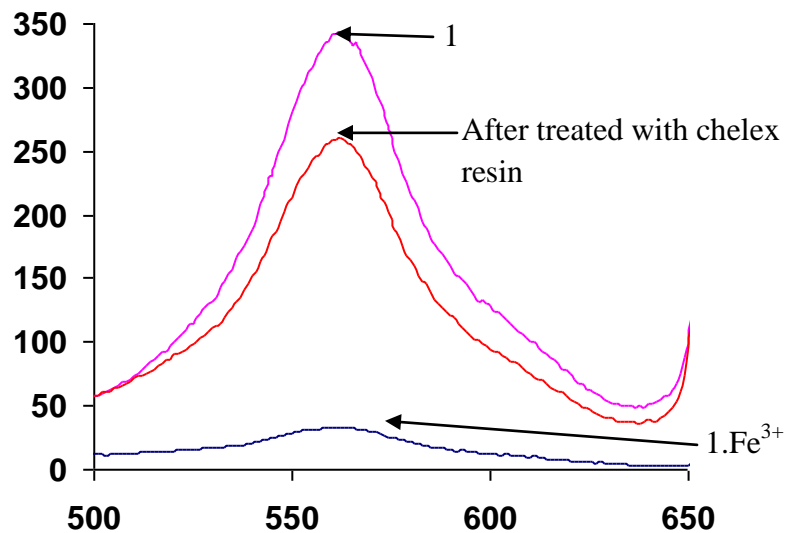

**Fig. S4A** Fluorescence spectra of compound **1** (10.0  $\mu\text{M}$ ) upon additions of 210 equiv. of  $\text{Fe}^{3+}$  ions in  $\text{H}_2\text{O}/\text{THF}$  (9:1) mixture buffered with HEPES, pH = 7.0, and treated with chelex resin after the addition of 210 equiv. of  $\text{Fe}^{3+}$  ions.

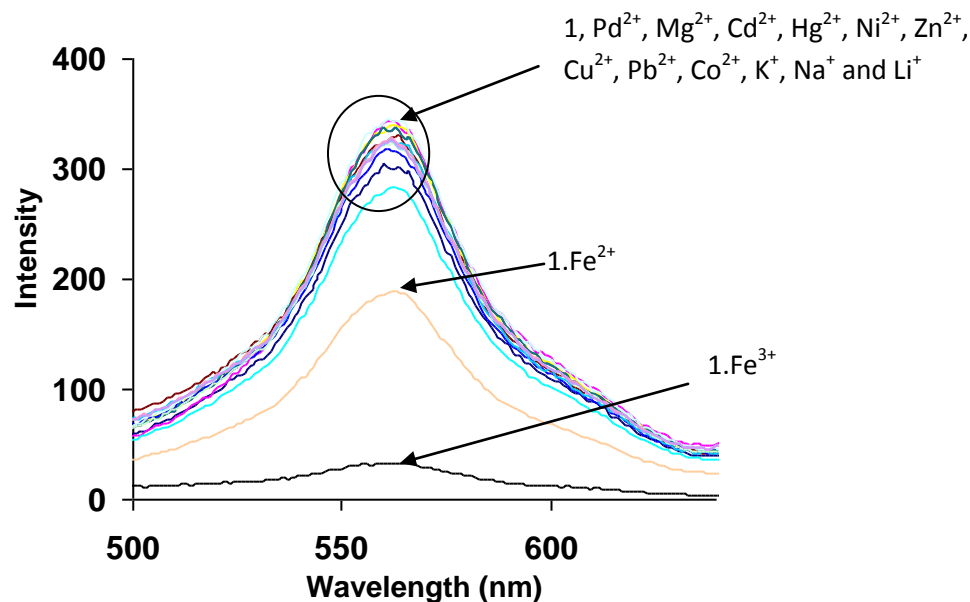

**Fig. S4B** Fluorescence spectra of compound **1** (10.0  $\mu\text{M}$ ) upon additions of 210 equiv. of various metal ions in  $\text{H}_2\text{O}/\text{THF}$  (9:1) mixture buffered with HEPES, pH = 7.0

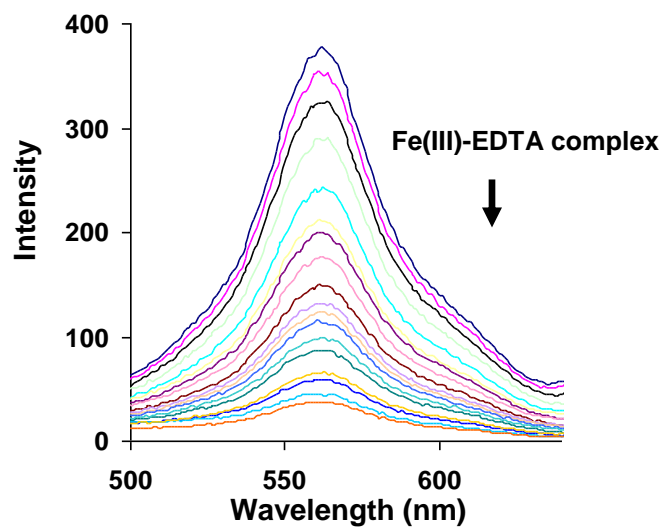

**Fig. S5** Fluorescence spectra of compound **1** ( $10.0 \mu\text{M}$ ) upon additions of 230 equiv. of Fe(III)-EDTA complex in  $\text{H}_2\text{O}/\text{THF}$  (9:1) mixture buffered with HEPES,  $\text{pH} = 7.0$

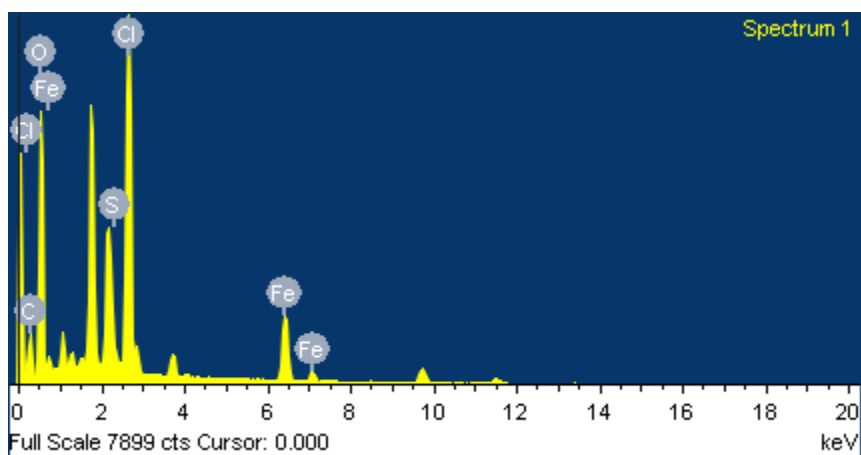

**Fig. S6** SEM-EDX spectrum of nanoaggregates of **1** in presence of  $\text{Fe}^{3+}$  ions



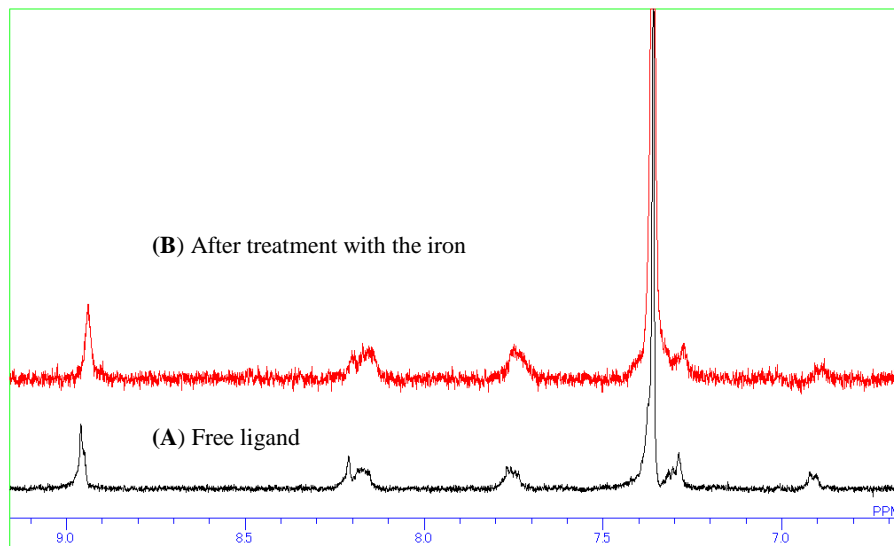

**Fig. S7**  $^1\text{H}$  NMR spectra of **1** in  $\text{CDCl}_3/\text{CD}_3\text{CN}$  (8:2). (A) Free ligand (B) after treatment with the iron perchlorate (iron ions has been removed before NMR studies using chelex resin)<sup>2</sup>

---

<sup>2</sup> (a) D. Y. Lee and H. C. Zheng, *Plant Soil*, 1994, **164**, 19; (b) M. H. Kim, H. H. Jang, S. Yi, S. K. Chang and M. S. Han, *Chem. Commun.*, 2009, 4838.

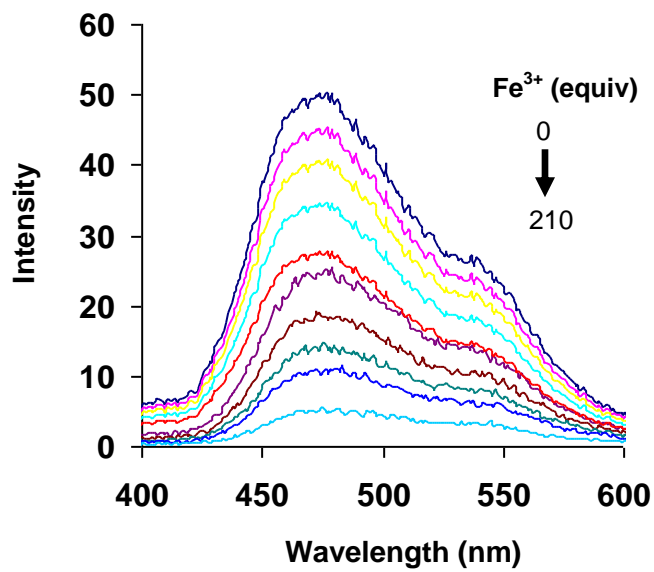

**Fig. S8** Change in fluorescence spectrum of compound **1** (10  $\mu\text{M}$ ) with the addition of  $\text{Fe}^{3+}$  ions in THF

$^1\text{H}$  NMR of compound **1** in  $\text{CDCl}_3$

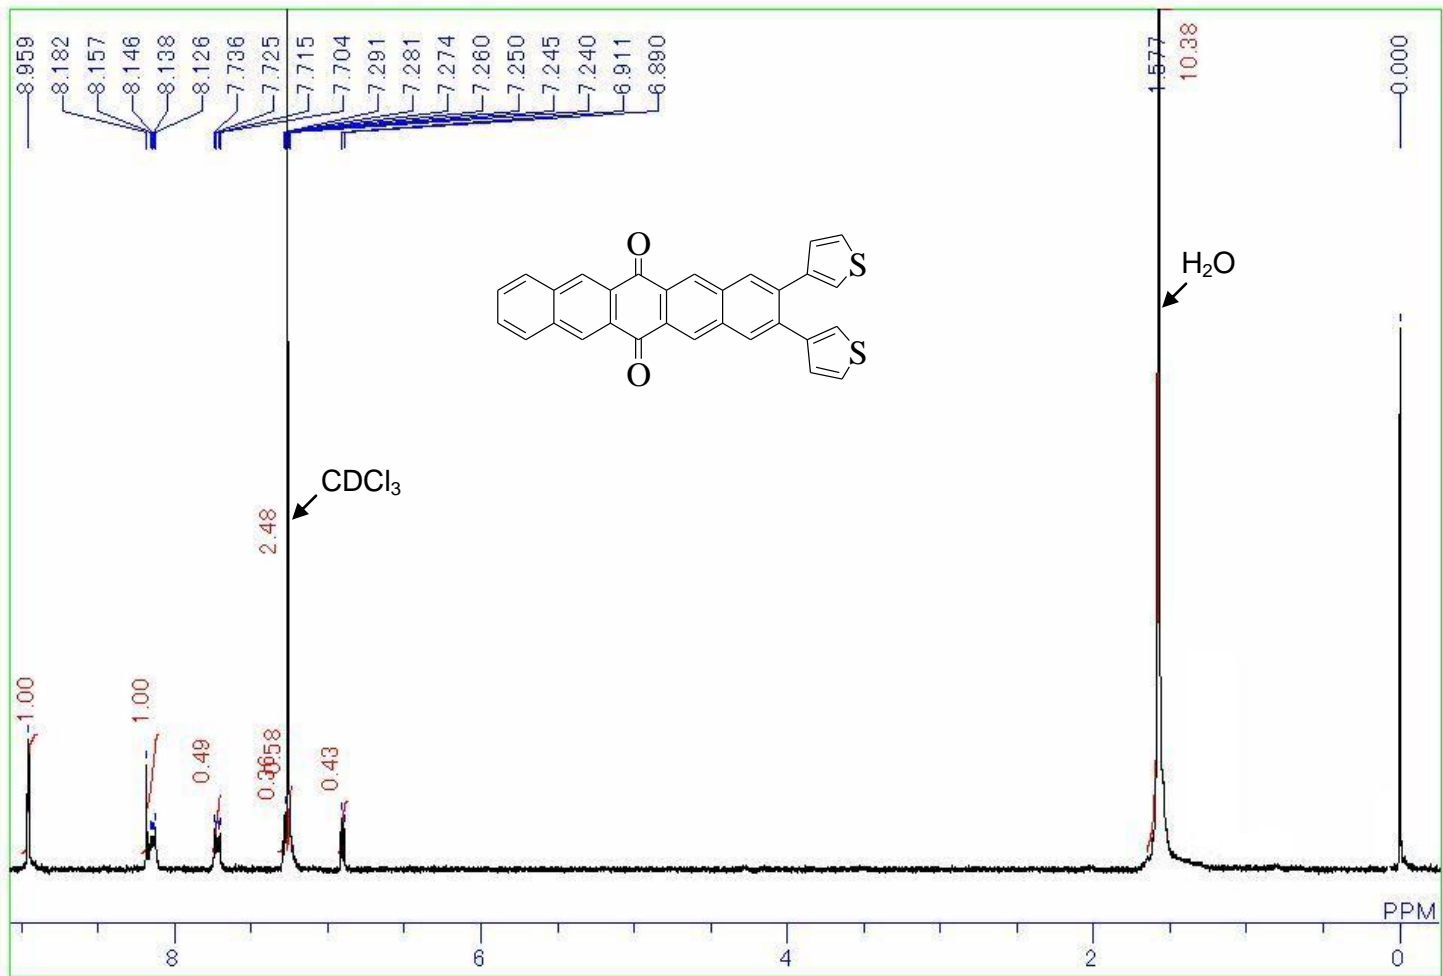

Figure S9  $^1\text{H}$  NMR spectrum of compound **1**

$^{13}\text{C}$  NMR of compound **1** in  $\text{CDCl}_3$

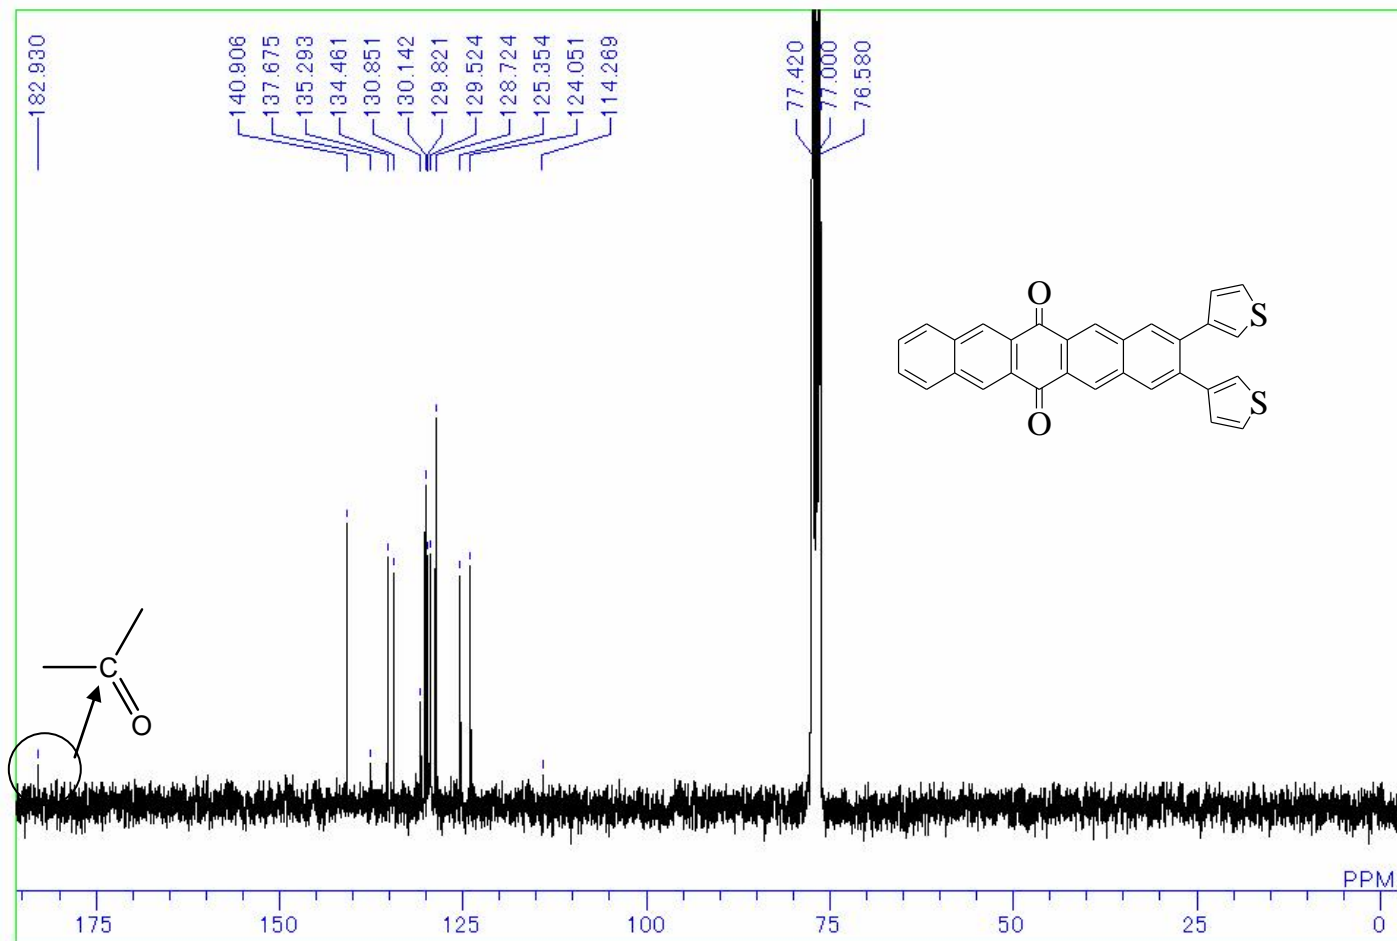

**Figure S10**  $^{13}\text{C}$  NMR spectrum of compound **1**.

### Mass spectrum of compound 1

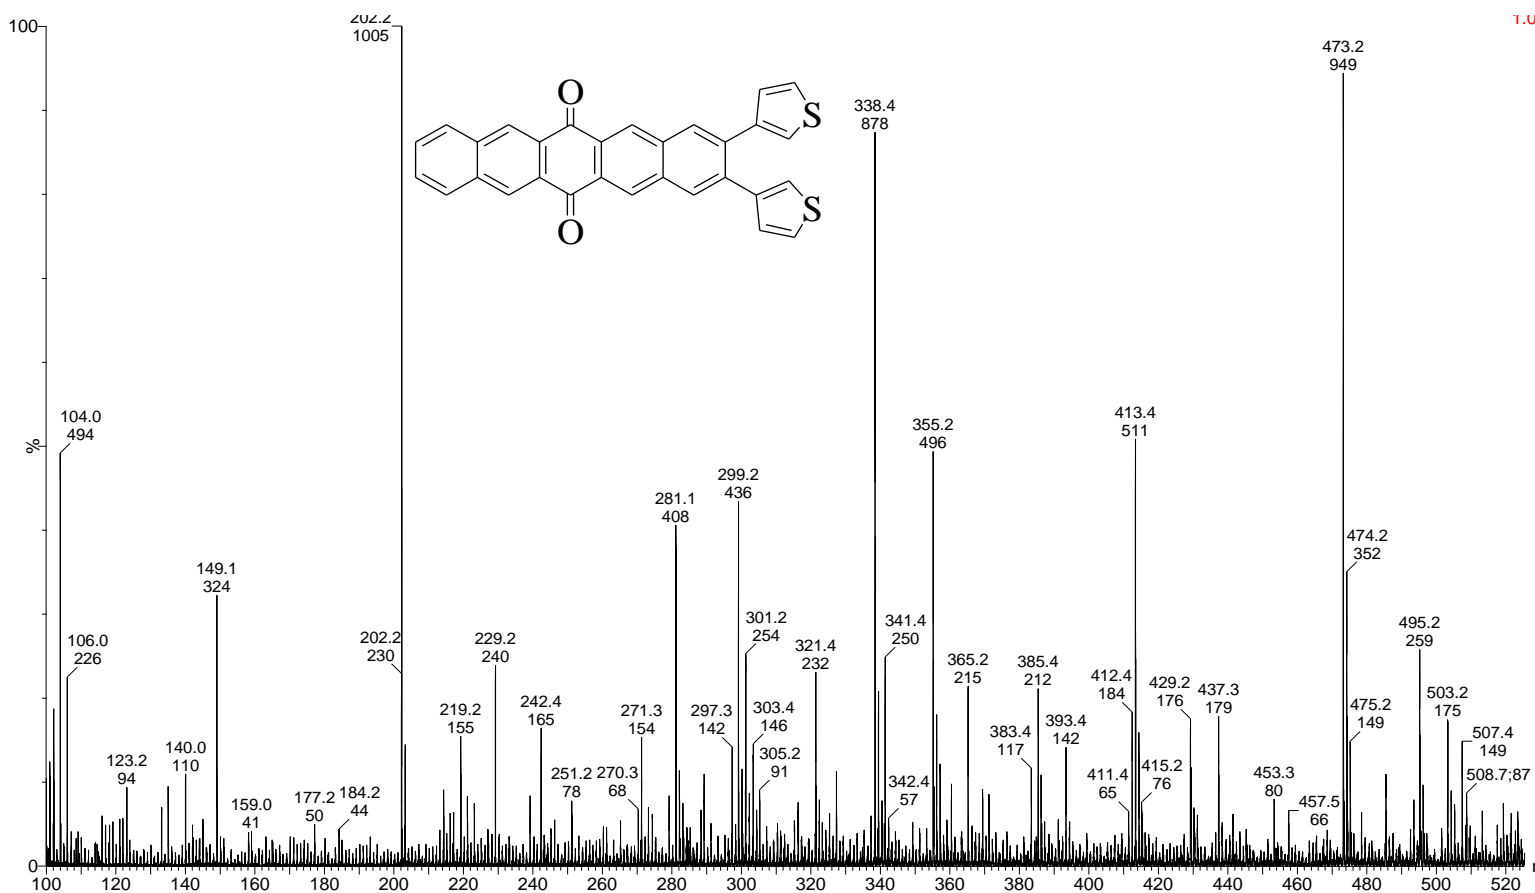

Figure S11 Mass spectrum of compound 1
